# Supplementary material
Source: PubMed Central journal article supplement (PMC2722325)
Supplement: 0903460106_0903460106SI.pdf [file 0903460106_0903460106SI.pdf]

# Supporting Information

Heltzel et al. 10.1073/pnas.0903460106

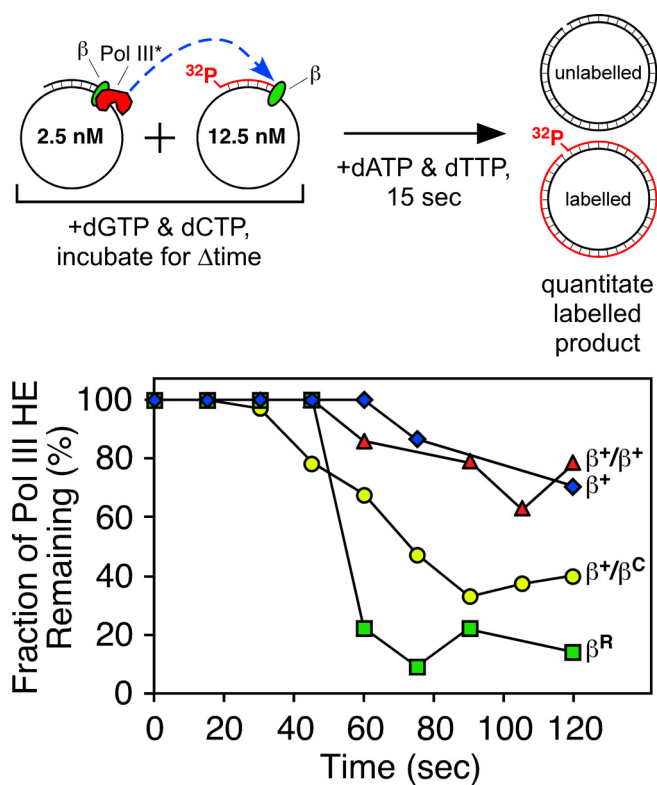

**Fig. S1.** Ability of wild-type and mutant  $\beta$  clamps to stabilize Pol III\* on a primed DNA template in vitro. The cartoon above summarizes the method. Stability of Pol III\* on the primed DNA template (fraction remaining) was calculated by measuring the level of replication products by densitometry (Molecular Analyst; Bio-Rad Laboratories) at each time point, and dividing the level observed at  $t = t_0$  by that for  $t = t_n$  ( $n = 15-120$  s), and is expressed as percent.

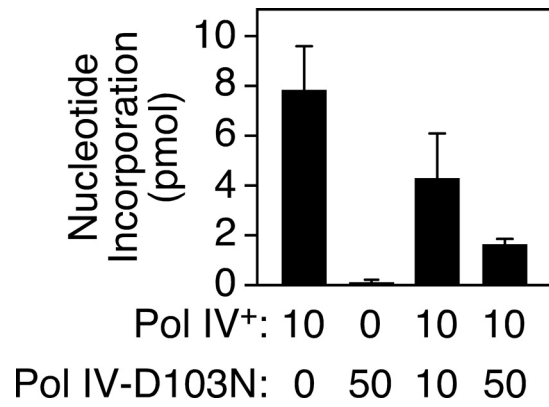

**Fig. S2.** Replication activity of Pol IV-D103N mutant. Replication activity was measured as described in *Materials and Methods*. Indicated levels (0, 10, or 50 nM) of Pol IV<sup>+</sup> and Pol IV-D103N were mixed before addition of template and dNTPs. Results represent the average of triplicates. Error bars represent the standard deviation.

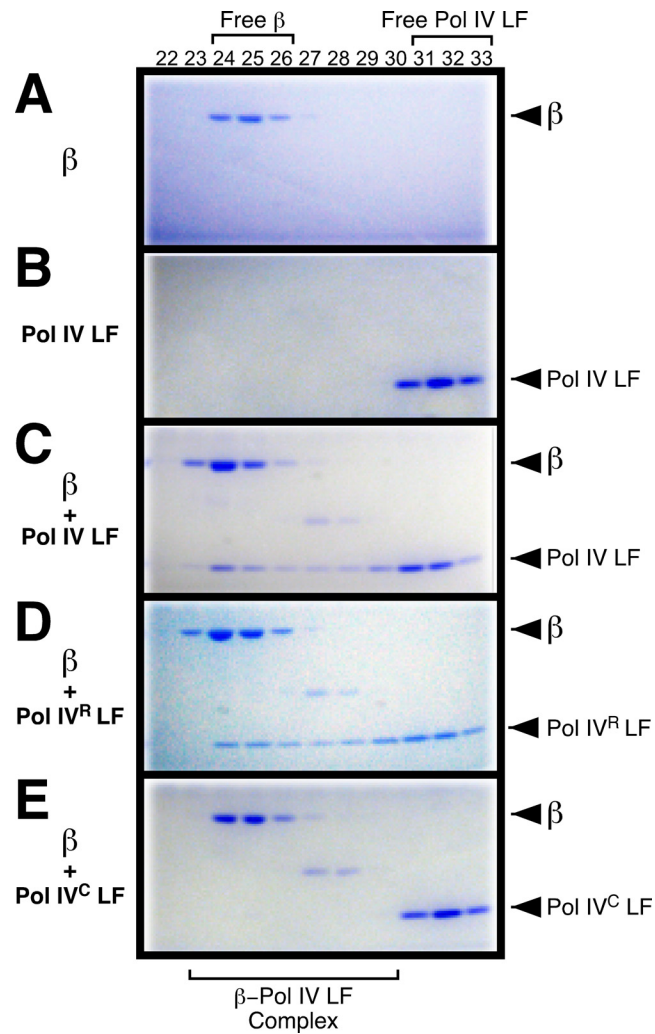

**Fig. S3.** Interactions of  $\beta$  clamp with different mutant Pol IV little finger proteins. Interactions of the wild-type Pol IV little finger domain (Pol IV LF), Pol IV<sup>R</sup> LF, and Pol IV<sup>C</sup> LF were measured by Superose-12 gel filtration chromatography (GE Healthcare) as described in *Materials and Methods*. Pol IV LF complexes were purified as described in *Materials and Methods*.  $\beta$  clamp (250  $\mu$ g) was mixed with 250  $\mu$ g of the indicated Pol IV LF protein in 20 mM imidazole, 100 mM NaCl, 50 mM Tris-HCl, pH 7.0, and 10% glycerol. Samples were incubated for 30 min at room temperature prior gel filtration. After filtration, 10  $\mu$ L of each indicated fraction (500  $\mu$ L) were electrophoresed through 13% SDS/PAGE. Gels were stained with Coomassie brilliant blue R-250, and the fraction of the  $\beta$  clamp in complex with Pol IV LF was determined by densitometry using a BSA standard curve and the Molecular Analyst software (Bio-Rad Laboratories). Wild-type Pol IV LF (50%) was determined to be in complex with  $\beta$  clamp, while only 24% of the Pol IV<sup>R</sup> LF was determined to be in complex with  $\beta$  clamp. Pol IV<sup>C</sup> LF was unable to interact with the  $\beta$  clamp with this assay.

**Table S1. Primers used for QuikChange site-directed mutagenesis**

| Protein              | Mutation(s)                                                           | Primer sequence (5'→3')                                                           |
|----------------------|-----------------------------------------------------------------------|-----------------------------------------------------------------------------------|
| $\beta^R$            | E93→K<br>L98→K                                                        | CGTGCAGCTGAAAGGTGAACGGATGAAAGTACGCTCCGG<br>CCGGAGCGTACTTTCATCCGTTACCTTTCAGCTGCACG |
| Pol IV-D103N         | D103→N                                                                | GACATCGAGATAGGCCTCATTCAAGTACAACGG<br>CCGTTGCACTGAATGAGGCCTATCTCGATGTC             |
| Pol IV <sup>C</sup>  | $\Delta$ 346–351                                                      | GGAAAGACAATGAGTGCTGGGATTATG<br>CATAATCCCAGCACTCATTGTCTTTCC                        |
| Pol IV <sup>LF</sup> | $\Delta$ 1–242                                                        | CAGCGAACGGTTGCGACATATGGTCGGCGTGGAACGC<br>GCGTTCACGCCGACCATATGTCGCAACCGTTCGCTG     |
| Pol IV <sup>R</sup>  | <sup>303</sup> VWP <sup>305</sup> → <sup>303</sup> AGA <sup>305</sup> | GGAGCACGCCGGGCGCGCTGAATAAAGC<br>GCTTTATTAGCCGCGCCCCGGCGTGCTCC                     |
